# Supplementary material
Source: Springer Nature journal article supplement (https://www.springermedizin.de/resource/supplementary/12958_2011_923_MOESM3_ESM.pdf/9568838)

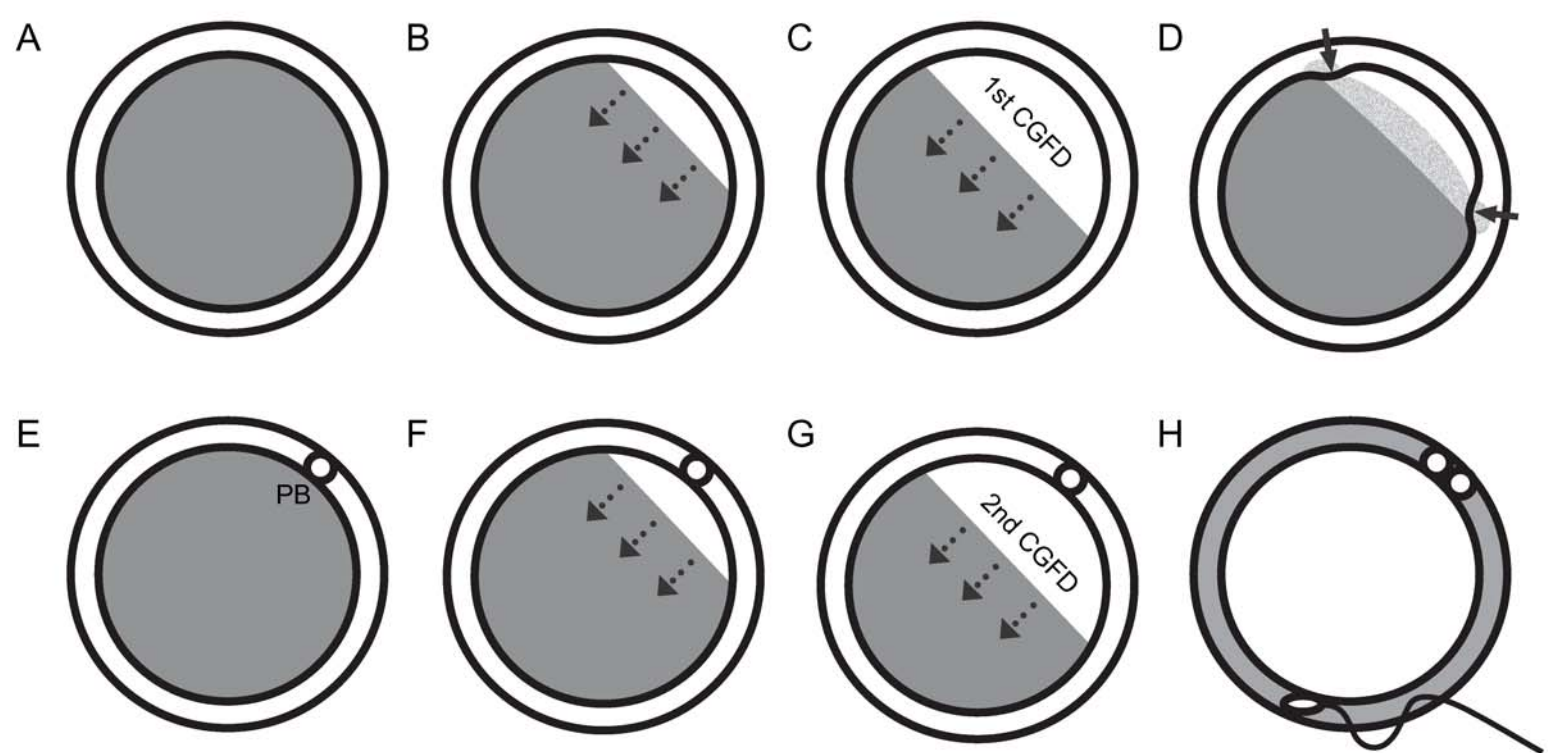

 = CG migration

 = Cleavage furrow

 = Pre-fertilization Release

PB = Polar body

Supplement: MOESM3 [file 9568838]
